# Supplementary material for: Schistosome Sulfotransferases: Mode of Action, Expression and Localization
Source: MDPI journal article supplement (doi:10.3390/pharmaceutics14071416), 2022-07-06
Supplement: s1 [file s1]

**Supplementary Table S1. Quantitative PCR Primer Sequences**

| Gene    | Orientation | Primer Sequence                         |
|---------|-------------|-----------------------------------------|
| SmSULT  | Forward     | 5'-ATT GGA TGG TTA CAT AGC AAC TAC -3'  |
|         | Reverse     | 5'-CCA TGG ATC ATT TGA TTT GGG T -3'    |
| ShSULT  | Forward     | 5'- ATA GCT ACA ACA GAT CTA CCA TCA -3' |
|         | Reverse     | 5'- TAA GTT TCC ATG GAT CCG TAG AT-3'   |
| SjSULT  | Forward     | 5'- TGATTGGTTGACAAGTTTTTCG-3'           |
|         | Reverse     | 5'- CACTAAAAGACGTTCCGGATGG-3'           |
| SmGAPDH | Forward     | 5'- GTG AAA GAG ATC CAG CAA ACA T -3'   |
|         | Reverse     | 5'- ATA TGA GCC TGA GCT TTA TCA ATG-3'  |
| ShGAPDH | Forward     | 5'- GAT CAA ATT AAG GCT GTG GTC A -3'   |
|         | Reverse     | 5'- CCA AAC TCA TTA TCG TAC CAT GAA -3' |
| SjGAPDH | Forward     | 5'- TCA GCT CAG ACT TTA TTG GAT GTA -3' |
|         | Reverse     | 5'- TTG TCG TAC CAT GAA ACC AGT -3'     |
| SmACTIN | Forward     | 5'- TGTTGTTGATAATGGATCAGGGA-3'          |
|         | Reverse     | 5'- CAGTTCGTCACAATACCGTG-3'             |
| ShACTIN | Forward     | 5'- GACGAAGAAGTTCAAGCCCT-3'             |
|         | Reverse     | 5'- CGTGTTTCGATTGGGTATTTTCAG-3'         |
| SjACTIN | Forward     | 5'- AGAGCTGTATTCCCTTCCATC-3'            |

|           |         |                                 |
|-----------|---------|---------------------------------|
|           | Reverse | 5'- TCTTCTCCATATCATCCCAGTTTG-3' |
| SmTUBULIN | Forward | 5'- CGGAATGGGAACACTACTCA-3'     |
|           | Reverse | 5'- GACGACTGTATCAGAGACCTTAG-3'  |
| ShTUBULIN | Forward | 5'- TTGGTTGATTCCGTCTTAGATGT-3'  |
|           | Reverse | 5'- TGTCAGATACTTTAGGCGATGG-3'   |
| SjTUBULIN | Forward | 5'- AATCAAATTGGTGCTAAGTTCTGG-3' |
|           | Reverse | 5'- CGTACACTGTCCATAGTTCCC-3'    |

**Supplementary Table S2. Digital PCR Primer Sets**

| Gene   | Orientation | Primer Sequence                         |
|--------|-------------|-----------------------------------------|
| SmSULT | Forward     | 5'-ATT GGA TGG TTA CAT AGC AAC TAC -3'  |
|        | Reverse     | 5'-CCA TGG ATC ATT TGA TTT GGG T -3'    |
| ShSULT | Forward     | 5'- ATA GCT ACA ACA GAT CTA CCA TCA -3' |
|        | Reverse     | 5'- TAA GTT TCC ATG GAT CCG TAG AT-3'   |
| SjSULT | Forward     | 5'- TGATTGGTTGACAAGTTTTCG-3'            |
|        | Reverse     | 5'- CACTAAAAGACGTTCCGGATGG-3'           |

**Supplementary Table S3: SULT T7 Primer Sequences**

| Gene   | Orientation | Primer Sequence                                  | Size                             |
|--------|-------------|--------------------------------------------------|----------------------------------|
| SmSULT | Forward     | 5'- (T7) TCT CAG CTG GTC TAC CGA GAA-3'          | 591 bp<br>sequence nt<br>41-606  |
|        | Reverse     | 5'- (T7)TCCCAACCATCACCAAGACG-3'                  |                                  |
| ShSULT | Forward     | 5'- (T7)GGCCTACCAAGAACAGGTACAA-3'                | 569 bp<br>sequence nt<br>85-654  |
|        | Reverse     | 5'- (T7)TGATTCCCAACCATCACCAAG-3'                 |                                  |
| SjSULT | Forward     | 5'-<br>(T7)GATACCTATAAAGAAGAAGTAGATAAAGTC-<br>3' | 197 bp<br>sequence nt<br>436-633 |
|        | Reverse     | 5'- (T7)AGA CGT TCG GAT GT ACA -3'               |                                  |

Example:  
Fold change of *S. mansoni*  
SULT expression relative  
to *S. haematobium* or  
*S. japonicum* SULT  
expression

$$= \frac{E_{SmGAPDH}^{(Ct_{SmGAPDH})} \div E_{SmSULT}^{(Ct_{SmSULT})}}{E_{ShGAPDH}^{(Ct_{ShGAPDH})} \div E_{ShSULT}^{(Ct_{ShSULT})}}$$

**Supplementary Figure S1.** Formula for Cross Species *SULT* Transcript Comparison. The method above is algebraically equivalent to the  $\Delta\Delta Ct$  method for determining relative transcript quantities. In the example given, the fold change of *S. mansoni SULT* expression is determined relative to *S. haematobium* or *S. japonicum SULT*.  $E_{SxGAPDH}$ ,  $E_{SxActin}$  &  $E_{SxTub}$ : Efficiency of Internal Reference.  $E_{SxSULT}$ : Efficiency of SULT Primers.  $Ct_{SxGAPDH}$ ,  $Ct_{SxActin}$  &  $Ct_{SxTub}$ : Critical threshold of Internal Reference Primers.  $Ct_{SxSULT}$ : Critical threshold of SULT Primers.  $x = m, h$ , or  $j$  (*S. mansoni*, *S. haematobium*, or *S. japonicum*).

#### **Video S1. Fluorescence *in situ* hybridization of *SmSULT*.**

Head of *S. mansoni* male. Please see attached video.

Cells positive for *SmSULT* stained positive for TAMRA-Tyramide, magenta. DAPI (blue) was used at a final concentration of 1 ug/mL to stain cell nuclei. FITC-positive cells are *Schistosoma* stem cells, positive for *Schistosoma histone H2B* [30, 31]. *SmSULT* and *H2B* probes were used at a final concentration of 150 ng/mL. FISH was performed on whole worms. This picture is represented of 4 male worms.

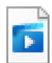

h2b\_sult\_MG  
copy.mov
